# Supplementary material for: Clinics register based HIV prevalence in Jimma zone, Ethiopia: applications of likelihood and Bayesian approaches
Source: Springer Nature journal article supplement (doi:10.1186/s12879-021-06965-0), 2022-03-24
Supplement: MOESM1 [file 20250394]

# Clinics Register based HIV Prevalence in Jimma Zone, Ethiopia: Applications of Likelihood and Bayesian Approaches: Additional Data

Nemso Geda Bedaso and Legesse Kassa Debusho\*

\* Corresponding author: [debusk@unisa.ac.za](mailto:debusk@unisa.ac.za)

## Descriptive analysis and $\chi^2$ test of association

Descriptive statistics with  $\chi^2$  test of association between patients' characteristic and HIV prevalence are displayed in Table A1. The  $\chi^2$  test results show that there was significant association between each of the patients' characteristic and HIV prevalence in the Jimma zone.

Table A1: Distribution of patient HIV prevalence by their characteristics among men and women in Jimma zone, Ethiopia, September 2018 to August 2019.

| Variables           | HIV status: n (%) |             | Distribution of patients |
|---------------------|-------------------|-------------|--------------------------|
|                     | Negative          | Positive    |                          |
| Gender              |                   |             |                          |
| Female              | 2345 (27.8)       | 1867 (22.1) | 4212 (49.9)              |
| Male                | 2180 (25.8)       | 2048 (24.3) | 4228 (50.1)              |
| Age                 |                   |             | < 0.0001                 |
| 15-19               | 697 (8.3)         | 963 (11.4)  | 1660 (18.6)              |
| 20-24               | 1481 (17.5)       | 1014 (12.0) | 2495 (28.0)              |
| 25-49               | 1607 (19.0)       | 1356 (16.1) | 2963 (33.2)              |
| >=50                | 740 (8.8)         | 582 (6.9)   | 1322 (14.5)              |
| Marital status      |                   |             | < 0.0001                 |
| Single              | 1010 (12.0)       | 824 (9.8)   | 1834 (21.8)              |
| Married             | 1635 (19.4)       | 1571 (18.6) | 3206 (38.0)              |
| Divorced            | 1206 (14.3)       | 944 (11.2)  | 2150 (25.5)              |
| Widowed             | 674 (8.0)         | 576 (6.8)   | 1250 (14.8)              |
| Education level     |                   |             | < 0.0001                 |
| No education        | 1436 (16.9)       | 925 (11.0)  | 2355 (27.9)              |
| Primary             | 1655 (19.6)       | 1889 (22.4) | 3544 (42.0)              |
| Secondary           | 1053 (12.5)       | 848 (10.0)  | 1901 (22.5)              |
| Superior            | 387 (4.6)         | 253 (3.0)   | 640 (7.6)                |
| Occupation          |                   |             | 0.0237                   |
| No job              | 794 (9.4)         | 655 (7.8)   | 1449 (17.2)              |
| Daily worker        | 1649 (19.5)       | 1449 (17.2) | 3098 (36.7)              |
| Farmer              | 1008 (11.9)       | 924 (10.9)  | 1932 (22.8)              |
| Government employee | 272 (3.2)         | 237 (2.8)   | 509 (6.0)                |
| Merchant            | 802 (9.5)         | 650 (7.7)   | 1452 (17.2)              |
| Religion            |                   |             | < 0.0001                 |
| Muslim              | 1901 (22.5)       | 1897 (22.5) | 3798 (45.0)              |
| Protestant          | 1863 (22.1)       | 1277 (15.1) | 3140 (37.2)              |
| Orthodox & others   | 761 (9.0)         | 741 (8.8)   | 1502 (17.8)              |
| Residence           |                   |             | < 0.0001                 |
| Rural               | 2164 (25.6)       | 1652 (19.6) | 3816 (45.2)              |
| Urban               | 2361 (28.0)       | 2263 (26.8) | 4624 (54.8)              |
| Condom use          |                   |             | < 0.0001                 |
| Yes                 | 3867 (45.8)       | 316 (3.7)   | 4183 (49.5)              |
| No                  | 658 (7.8)         | 3599 (42.6) | 4257 (50.4)              |

## Results of Bayesian analyses

Table A2: Parameter estimates of the GLMM in equation (1) for women HIV prevalence data using different choices of priors for district variance.

| Coefficients                        | Priors              |       |                        |       |                       |       |
|-------------------------------------|---------------------|-------|------------------------|-------|-----------------------|-------|
|                                     | $\Gamma(1, 0.0005)$ |       | $\Gamma(0.001, 0.001)$ |       | $\Gamma(0.5, 0.0164)$ |       |
|                                     | Mean                | SD    | Mean                   | SD    | Mean                  | SD    |
| Intercept                           | -3.328              | 0.250 | -3.345                 | 0.253 | -3.340                | 0.252 |
| Age (ref: $\geq 50$ )               |                     |       |                        |       |                       |       |
| 15 – 19                             | 0.547               | 0.192 | 0.554                  | 0.192 | 0.552                 | 0.192 |
| 20 – 24                             | -0.349              | 0.162 | -0.349                 | 0.162 | -0.349                | 0.162 |
| 25 – 49                             | -0.099              | 0.157 | -0.096                 | 0.157 | -0.097                | 0.157 |
| Marital status (ref: Single)        |                     |       |                        |       |                       |       |
| Married                             | 0.512               | 0.147 | 0.519                  | 0.148 | 0.517                 | 0.147 |
| Divorced                            | 0.411               | 0.162 | 0.418                  | 0.162 | 0.416                 | 0.162 |
| Widowed                             | 0.503               | 0.183 | 0.510                  | 0.183 | 0.508                 | 0.183 |
| Education level (ref: No education) |                     |       |                        |       |                       |       |
| Primary                             | 0.493               | 0.122 | 0.493                  | 0.122 | 0.493                 | 0.122 |
| Secondary                           | 0.285               | 0.140 | 0.285                  | 0.141 | 0.285                 | 0.141 |
| Superior                            | 0.276               | 0.211 | 0.278                  | 0.212 | 0.277                 | 0.212 |
| Occupation (ref: No job)            |                     |       |                        |       |                       |       |
| Daily laborer                       | 0.151               | 0.144 | 0.151                  | 0.144 | 0.151                 | 0.144 |
| Farmer                              | 0.081               | 0.156 | 0.078                  | 0.157 | 0.079                 | 0.157 |
| Government employee                 | 0.010               | 0.250 | 0.006                  | 0.250 | 0.007                 | 0.250 |
| Merchant                            | 0.210               | 0.171 | 0.208                  | 0.172 | 0.209                 | 0.172 |
| Religion (ref: Muslim)              |                     |       |                        |       |                       |       |
| Orthodox                            | -0.110              | 0.138 | -0.113                 | 0.138 | -0.112                | 0.138 |
| Protestant                          | -0.368              | 0.111 | -0.370                 | 0.111 | -0.369                | 0.111 |
| Residence (ref: Rural)              |                     |       |                        |       |                       |       |
| Urban                               | 0.125               | 0.100 | 0.125                  | 0.100 | 0.125                 | 0.100 |
| Condom use (ref: Yes)               |                     |       |                        |       |                       |       |
| No                                  | 4.325               | 0.110 | 4.337                  | 0.110 | 4.334                 | 0.109 |
| <i>Random effect</i>                |                     |       |                        |       |                       |       |
| $\sigma_b$                          | 0.278               | 0.080 | 0.325                  | 0.085 | 0.311                 | 0.080 |

Table A3: Parameter estimates of the GLMM in equation (1) for men HIV prevalence data using different choices of priors for district variance.

| Coefficients                        | Priors              |       |                        |       |                       |       |
|-------------------------------------|---------------------|-------|------------------------|-------|-----------------------|-------|
|                                     | $\Gamma(1, 0.0005)$ |       | $\Gamma(0.001, 0.001)$ |       | $\Gamma(0.5, 0.0164)$ |       |
|                                     | Mean                | SD    | Mean                   | SD    | Mean                  | SD    |
| Intercept                           | -3.259              | 0.245 | -3.288                 | 0.252 | -3.285                | 0.250 |
| Age (ref: $\geq 50$ )               |                     |       |                        |       |                       |       |
| 15 – 19                             | 0.584               | 0.182 | 0.600                  | 0.183 | 0.599                 | 0.182 |
| 20 – 24                             | -0.093              | 0.157 | -0.079                 | 0.158 | -0.080                | 0.158 |
| 25 – 49                             | 0.109               | 0.149 | 0.113                  | 0.149 | 0.113                 | 0.149 |
| Marital status (ref: Single)        |                     |       |                        |       |                       |       |
| Married                             | 0.403               | 0.143 | 0.416                  | 0.143 | 0.415                 | 0.143 |
| Divorced                            | 0.337               | 0.158 | 0.355                  | 0.158 | 0.353                 | 0.158 |
| Widowed                             | 0.305               | 0.182 | 0.316                  | 0.182 | 0.315                 | 0.182 |
| Education level (ref: No education) |                     |       |                        |       |                       |       |
| Primary                             | 0.386               | 0.120 | 0.388                  | 0.120 | 0.388                 | 0.120 |
| Secondary                           | 0.118               | 0.140 | 0.118                  | 0.140 | 0.118                 | 0.140 |
| Superior                            | 0.140               | 0.209 | 0.146                  | 0.210 | 0.146                 | 0.210 |
| Occupation (ref: No job)            |                     |       |                        |       |                       |       |
| Daily laborer                       | 0.227               | 0.144 | 0.219                  | 0.144 | 0.220                 | 0.144 |
| Farmer                              | 0.385               | 0.161 | 0.371                  | 0.162 | 0.373                 | 0.162 |
| Government employee                 | 0.361               | 0.236 | 0.336                  | 0.236 | 0.338                 | 0.236 |
| Merchant                            | 0.160               | 0.169 | 0.149                  | 0.169 | 0.150                 | 0.169 |
| Religion (ref: Muslim)              |                     |       |                        |       |                       |       |
| Orthodox                            | -0.139              | 0.137 | -0.140                 | 0.137 | -0.140                | 0.137 |
| Protestant                          | -0.324              | 0.109 | -0.323                 | 0.109 | -0.323                | 0.109 |
| Residence (ref: Rural)              |                     |       |                        |       |                       |       |
| Urban                               | 0.256               | 0.099 | 0.256                  | 0.099 | 0.256                 | 0.099 |
| Condom use (ref: Yes)               |                     |       |                        |       |                       |       |
| No                                  | 4.205               | 0.107 | 4.235                  | 0.106 | 4.232                 | 0.106 |
| <i>Random effect</i>                |                     |       |                        |       |                       |       |
| $\sigma_b$                          | 0.182               | 0.120 | 0.307                  | 0.100 | 0.293                 | 0.092 |

Table A4: Parameter estimates of the GLMM in equation (1) for full HIV prevalence data using different choices of priors for district variance.

|                                     | Priors              |       |                        |       |                       |       |
|-------------------------------------|---------------------|-------|------------------------|-------|-----------------------|-------|
|                                     | $\Gamma(1, 0.0005)$ |       | $\Gamma(0.001, 0.001)$ |       | $\Gamma(0.5, 0.0164)$ |       |
|                                     | Mean                | SD    | Mean                   | SD    | Mean                  | SD    |
| Intercept                           | -3.231              | 0.185 | -3.238                 | 0.187 | -3.236                | 0.186 |
| Age (ref: $\geq 50$ )               |                     |       |                        |       |                       |       |
| 15 – 19                             | 0.576               | 0.132 | 0.579                  | 0.132 | 0.578                 | 0.132 |
| 20 – 24                             | -0.205              | 0.113 | -0.204                 | 0.113 | -0.204                | 0.113 |
| 25 – 49                             | 0.016               | 0.108 | 0.017                  | 0.108 | 0.017                 | 0.108 |
| Gender (ref: Male)                  |                     |       |                        |       |                       |       |
| Female                              | -0.150              | 0.070 | -0.151                 | 0.070 | -0.151                | 0.070 |
| Marital status (ref: Single)        |                     |       |                        |       |                       |       |
| Married                             | 0.464               | 0.103 | 0.466                  | 0.103 | 0.466                 | 0.103 |
| Divorced                            | 0.391               | 0.113 | 0.394                  | 0.113 | 0.394                 | 0.113 |
| Widowed                             | 0.413               | 0.129 | 0.416                  | 0.129 | 0.415                 | 0.129 |
| Education level (ref: No education) |                     |       |                        |       |                       |       |
| Primary                             | 0.435               | 0.085 | 0.435                  | 0.085 | 0.435                 | 0.085 |
| Secondary                           | 0.191               | 0.099 | 0.191                  | 0.099 | 0.191                 | 0.099 |
| Superior                            | 0.212               | 0.148 | 0.213                  | 0.148 | 0.213                 | 0.148 |
| Occupation (ref: No job)            |                     |       |                        |       |                       |       |
| Daily laborer                       | 0.192               | 0.102 | 0.192                  | 0.102 | 0.192                 | 0.102 |
| Farmer                              | 0.224               | 0.112 | 0.222                  | 0.112 | 0.223                 | 0.112 |
| Government employee                 | 0.196               | 0.171 | 0.195                  | 0.171 | 0.195                 | 0.171 |
| Merchant                            | 0.174               | 0.120 | 0.173                  | 0.120 | 0.173                 | 0.120 |
| Religion (ref: Muslim)              |                     |       |                        |       |                       |       |
| Orthodox                            | -0.128              | 0.097 | -0.129                 | 0.097 | -0.129                | 0.097 |
| Protestant                          | -0.352              | 0.078 | -0.352                 | 0.078 | -0.352                | 0.078 |
| Residence (ref: Rural)              |                     |       |                        |       |                       |       |
| Urban                               | 0.193               | 0.070 | 0.193                  | 0.070 | 0.193                 | 0.070 |
| Condom use (ref: Yes)               |                     |       |                        |       |                       |       |
| No                                  | 4.261               | 0.076 | 4.267                  | 0.076 | 4.265                 | 0.076 |
| <i>Random effect</i>                |                     |       |                        |       |                       |       |
| $\sigma_b$                          | 0.269               | 0.063 | 0.300                  | 0.069 | 0.291                 | 0.066 |
